# Supplementary material
Source: PubMed Central journal article supplement (PMC4468477)
Supplement: JVI.00571-15_zjv999090493so1.pdf [file JVI.00571-15_zjv999090493so1.pdf]

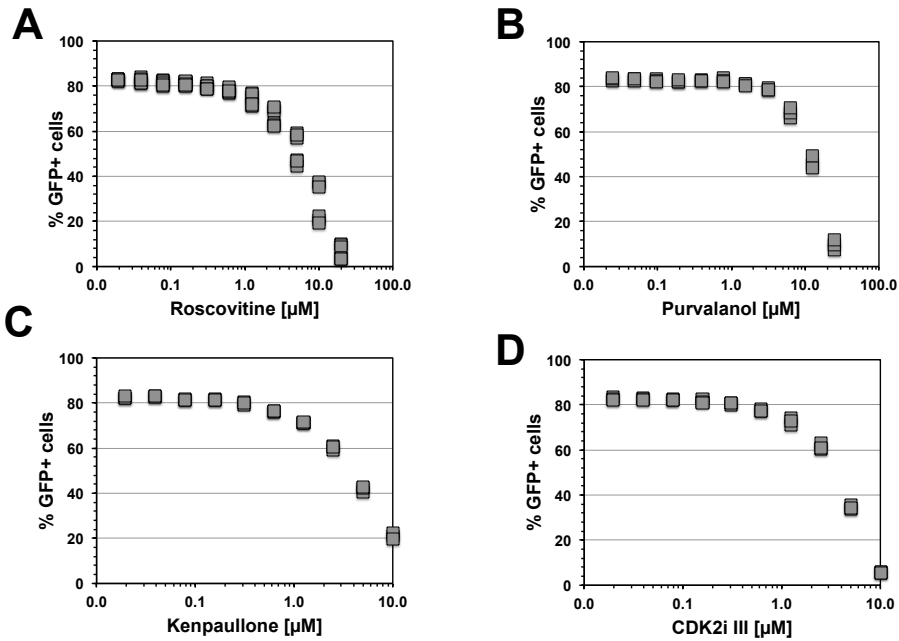

1  
2  
3  
4  
5  
6  
7  
8

**Supplemental Figure 1: Effects of CDK2 inhibition on induced HIV-1 reactivation in EF7 T cells.** Complementary to Figure 3, we tested the concentration dependent effect of (A) Roscovitine, (B) Purvalanol, (C) and Kenpaullone (D) CDK2 inhibitor III on PMA-induced HIV-1 reactivation in EF7 T cells. The results show data for at least 3 independent experiments per tested inhibitor.

1 **Supplemental Table 1:** Altered kinase activities in latently HIV-1 infected CA5 T cells as  
 2 detected by Kinexus antibody arrays, PamGene kinase substrate array analysis and upstream  
 3 kinase predictions. For the Kinexus antibody arrays globally normalized fluorescence data for  
 4 each altered kinase/phosphatase/transcription factor are presented, as well as Z-ratios. Z  
 5 normalization in general displays greater stability as a result of examining where each signal  
 6 falls in the overall distribution of values within a given sample than fold-induction data. For  
 7 further details see the detailed description in for the kinome data analysis the Material and  
 8 Methods section. The complete selection of kinases was uploaded into MetaCore to derive the  
 9 protein-protein interaction network depicted in Figure 6.

**A**

| Target Protein Name | Phospho Site (Human) | Globally Normalized - Jurkat | Globally Normalized - CA5 | Z-ratio (CA5, Jurkat) | Uniprot Link |
|---------------------|----------------------|------------------------------|---------------------------|-----------------------|--------------|
| PTP1D               | Pan-specific         | 3334                         | 791                       | -2.36                 | Q06124       |
| Pyk2                | Y679                 | 1903                         | 525                       | -2.62                 | Q14289       |
| ROKa (ROCK2)        | Pan-specific         | 4495                         | 1254                      | -2.58                 | Q75116       |
| PTP1B               | Pan-specific         | 3394                         | 1056                      | -2.34                 | P18031       |
| Progesterone Recept | S294                 | 1219                         | 414                       | -2.26                 | P05401       |
| Rb                  | S780                 | 942                          | 330                       | -2.17                 | P05400       |
| RIP2/RICK           | Pan-specific         | 2470                         | 844                       | -2.17                 | Q43553       |
| IRAK2               | Pan-specific         | 940                          | 351                       | -2.64                 | Q43187       |
| IKBa                | Y42                  | 1762                         | 674                       | -1.95                 | P25963       |
| PTP1C               | Pan-specific         | 4976                         | 1853                      | -1.95                 | P23350       |
| GSK3a               | Y279                 | 612                          | 294                       | -1.77                 | P49840       |
| Rad17               | S656                 | 1597                         | 687                       | -1.72                 | Q75943       |
| Rac1                | Pan-specific         | 3325                         | 1469                      | -1.62                 | P83000       |
| Rac1                | S71                  | 2091                         | 942                       | -1.61                 | P83000       |
| RONa                | Pan-specific         | 2169                         | 987                       | -1.58                 | Q04912       |
| PRAS40              | T246                 | 761                          | 390                       | -1.56                 | Q98636       |
| HspBP1              | Pan-specific         | 2770                         | 1268                      | -1.56                 | Q9N2L4       |
| CDK1/2              | Y15                  | 4333                         | 2015                      | -1.50                 | P06493       |
| MSH2                | Pan-specific         | 2620                         | 1238                      | -1.50                 | P43246       |
| PTP1D               | S580                 | 4415                         | 2147                      | -1.41                 | Q06124       |
| HR23B               | Pan-specific         | 1914                         | 993                       | -1.32                 | P54727       |
| Chk1                | S280                 | 4025                         | 2056                      | -1.31                 | Q14757       |
| Src                 | Y419                 | 817                          | 443                       | -1.28                 | P12931       |
| CDK1/2              | Y15                  | 977                          | 531                       | -1.26                 | P06493       |
| CDK1/2              | Y15                  | 3275                         | 1740                      | -1.24                 | P06493       |
| SPHK2               | Pan-specific         | 657                          | 366                       | -1.24                 | Q9NRA0       |
| Myc                 | S373                 | 1576                         | 858                       | -1.23                 | P11106       |
| S6K1                | T412                 | 563                          | 315                       | -1.23                 | P23443       |
| NIK (MAP3K14)       | Pan-specific         | 1799                         | 998                       | -1.19                 | Q99558       |
| Rb                  | S807                 | 554                          | 319                       | -1.18                 | P06400       |
| Abl                 | Pan-specific         | 567                          | 327                       | -1.17                 | P00519       |
| PTEN                | 380*Y382+T38         | 4089                         | 2251                      | -1.16                 | P60484       |
| MEK2 (MAP2K2)       | T394                 | 2322                         | 1300                      | -1.15                 | P26507       |
| PTEN                | 380*Y382+T38         | 2604                         | 1475                      | -1.12                 | P60484       |
| PTEN                | 380*Y382+S38         | 3250                         | 1831                      | -1.12                 | P60484       |
| Nf-kappaB p65       | S529                 | 1232                         | 721                       | -1.10                 | Q04206       |
| ZAP70               | Pan-specific         | 3272                         | 1870                      | -1.09                 | P43403       |
| RSK1/2/3            | S737/S777/S70        | 497                          | 300                       | -1.09                 | Q15418       |
| MKP2                | Pan-specific         | 2649                         | 1547                      | -1.06                 | Q13115       |
| HDAC4               | Pan-specific         | 594                          | 364                       | -1.04                 | P58524       |
| PP5C                | Pan-specific         | 2110                         | 1255                      | -1.03                 | P53041       |
| JNK1/2/3            | Pan-specific         | 2901                         | 4659                      | 1.03                  | P45983       |
| CASP3               | Pan-specific         | 1151                         | 1914                      | 1.06                  | P42574       |
| CDC2L5 (CHED)       | Pan-specific         | 971                          | 1632                      | 1.06                  | Q14024       |
| GCK                 | Pan-specific         | 5801                         | 9326                      | 1.07                  | Q12851       |
| Cofilin 2           | S3                   | 9207                         | 14692                     | 1.09                  | Q9Y281       |
| Hsc70               | Pan-specific         | 3050                         | 5044                      | 1.10                  | P11142       |
| Hsp1 (MAP4K1)       | Pan-specific         | 10367                        | 16569                     | 1.10                  | Q92918       |
| PKCdelta            | T655                 | 822                          | 1416                      | 1.10                  | P24723       |
| IGF1R               | Y1289                | 2941                         | 4909                      | 1.11                  | P08089       |
| CDK2                | Pan-specific         | 4448                         | 7415                      | 1.13                  | P24941       |
| IKKa                | Pan-specific         | 8492                         | 13904                     | 1.13                  | Q15111       |
| IRAK3               | Pan-specific         | 503                          | 965                       | 1.30                  | Q9V816       |
| Hsp105              | Pan-specific         | 4115                         | 7703                      | 1.37                  | Q92598       |
| Hsp27               | S15                  | 5912                         | 11021                     | 1.38                  | P04792       |
| Caveolin 2          | Pan-specific         | 1364                         | 2708                      | 1.43                  | P51636       |
| IRAK1               | Pan-specific         | 2773                         | 5657                      | 1.92                  | P51817       |
| Hsp90a/b            | Pan-specific         | 1298                         | 2737                      | 1.95                  | P07300       |
| JNK2 (MAPK9)        | Pan-specific         | 1275                         | 2755                      | 1.99                  | P45984       |
| CPG16/CaMKinase V   | Pan-specific         | 2588                         | 5842                      | 1.73                  | Q15075       |
| IKBa                | Pan-specific         | 3177                         | 7639                      | 1.87                  | P25963       |

**B**

| Peptide Substrate | Sequence       | Tyrosine        | Uniprot Link |
|-------------------|----------------|-----------------|--------------|
| DCX_109_121       | GIVYAVSSDRFRS  | [112]           | O43602       |
| K2C6B_53_65       | GAGFGSRSLYGLG  | [62]            | P04259       |
| CDK2_8_20         | EKIGEGTYGVVYK  | [15, 19]        | P24941       |
| DYR1A_312_324     | CQLGQRIYQVYQS  | [319, 321]      | Q13627       |
| MK10_216_228      | TSFMMPYVVVTRY  | [223, 228]      | P53779       |
| MK12_178_190      | ADSEMTGYVVVTRW | [185]           | P53778       |
| NCF1_313_325      | QRSRKRSLQDAYR  | [324]           | P14598       |
| RON_1353_1365     | YVQLPATYMNLP   | [1353, 1360]    | Q04912       |
| TYRO3_679_691     | KIYSGDYRQGGCA  | [681, 685, 686] | Q06418       |

  

| Peptide Substrate | Sequence        | Serine           | Threonine | Uniprot Link |
|-------------------|-----------------|------------------|-----------|--------------|
| CAC1C_1974_1986   | ASLGRRASFLHEC   | [1975, 1981]     | []        | Q13936       |
| CFTR_730_742      | EPLERRLSLPDS    | [737, 742]       | []        | P13569       |
| DESP_2842_2854    | RSGSRRSFDATG    | [2843,2845,2849] | [2853]    | P15924       |
| EPB42_241_253     | LLNKRKRSVPILR   | [248]            | []        | P16452       |
| F263_454_466      | NPLMRRNSVTPLA   | [461]            | [463]     | Q16875       |
| KCNA6_504_516     | ANRRRRSYLPTP    | [511]            | [515]     | P17658       |
| KPB1_1011_1023    | QVEFRRLSISAES   | [1018,1020,1023] | []        | P46020       |
| MYPC3_268_280     | LSAFRRRTSLAGGG  | [269, 275]       | [274]     | Q14896       |
| TY3H_64_78        | RFIGRRQSLIEDARK | [71]             | []        | P07101       |

  

| Name              | Prot ID | # in data set |
|-------------------|---------|---------------|
| PIM1              | P11309  | 7             |
| MSK1 (RPS6KA5)    | O75582  | 6             |
| Pim3 (AL549548)   | P58750  | 6             |
| PKG1 (PRKG1)      | Q13976  | 6             |
| MAPKAPK3          | Q16644  | 5             |
| PKACa (PRKACA)    | P17612  | 4             |
| PKCb (PRKCB1)     | P05771  | 4             |
| PKG2 (PRKG2)      | Q13237  | 4             |
| AXL               | P30530  | 3             |
| BRK               | Q13882  | 3             |
| MAPKAPK2          | P49137  | 3             |
| PIM2              | Q9P1W9  | 3             |
| PKCa (PRKCA)      | P17252  | 3             |
| PKCa (PRKCA)      | P17252  | 3             |
| p70S6Kb (RPS6KB2) | Q9UBS0  | 2             |
| PKACb PRKACB      | P22694  | 2             |
| PKCd (PRKCD)      | Q05655  | 2             |
| PKCt (PRKCQ)      | Q04759  | 2             |
| TRKB (NTRK2)      | Q16620  | 2             |
| MEK1 (MAP2K1)     | Q02750  | 1             |
| MEK2 (MAP2K2)     | P36507  | 1             |
| MEK7 (MAP2K7)     | O14733  | 1             |
| p38a MAPK (MAPK)  | Q16539  | 1             |
| p38d MAPK (MAPK)  | O15264  | 1             |
| p38g MAPK (MAPK)  | P53778  | 1             |
| p70S6K (RPS6KB1)  | P23443  | 1             |
| PKCe (PRKCE)      | Q02156  | 1             |
| PKCg (PRKCG)      | P05129  | 1             |
| TRKA (NTRK1)      | P04629  | 1             |
| TRKC (NTRK3)      | Q16288  | 1             |

**C**

predicted kinases

| kinase target  | AS601245 |
|----------------|----------|
| ACK1           | 42.8     |
| CDK2/cyclin A  | 94.4     |
| CDK2/cyclin E  | 82.7     |
| CDK9/cyclin T1 | 23.3     |
| CK2a           | 22.1     |
| CK2a2          | 27.1     |
| DYRK1/DYRK1A   | 52.7     |
| DYRK1B         | 53.2     |
| DYRK2          | 22.2     |
| GSK3a          | 2.4      |
| GSK3b          | 6.2      |
| JNK1           | 87.6     |
| JNK2           | 67.5     |
| JNK3           | 105.3    |
| MUSK           | 14.8     |
| PIM1           | 11.6     |
| PIM2           | 91.2     |
| PIM3           | 3.7      |

**Supplemental Table 2: On-target/off-target activity of AS601245.** Numbers represent residual enzyme activity in the presence of the respective inhibitor.

*Data from: Anastassiadis T1, Deacon SW, Devarajan K, Ma H, Peterson JR. Nat Biotechnol. 2011 Oct 30;29(11):1039-45*

*Comprehensive assay of kinase catalytic activity reveals features of kinase inhibitor selectivity.*

1 **Supplemental Table 3**

2

| <b>Relevant characteristics of healthy donors</b> |             |            |             |
|---------------------------------------------------|-------------|------------|-------------|
| <b>Gender</b>                                     | <b>Race</b> | <b>CD4</b> | <b>%CD3</b> |
| F                                                 | AA          | -          | 81          |
| F                                                 | AA          | -          | 75          |
| M                                                 | C           | -          | 77          |
| M                                                 | C           | -          | 78          |
| M                                                 | C           | -          | 81          |
| M                                                 | AA          | -          | 75          |
| M                                                 | ASIAN       | -          | 76          |
| F                                                 | AA          | -          | 75          |
| M                                                 | C           | -          | 62          |

| <b>Relevant characteristics of HIV patients</b> |             |            |             |
|-------------------------------------------------|-------------|------------|-------------|
| <b>Gender</b>                                   | <b>Race</b> | <b>CD4</b> | <b>%CD3</b> |
| F                                               | AA          | 188        | 56          |
| F                                               | AA          | 158        | 70          |
| M                                               | C           | 131        | 63          |
| M                                               | C           | 284        | 76          |
| M                                               | C           | 117        | 53          |
| M                                               | AA          | 210        | 74          |
| M                                               | AA          | 148        | 68          |
| M                                               | AA          | 209        | 71          |

3

1 **Supplemental Table 4:** List of kinases/phosphatases found altered in T cells from HIV-1  
2 patients on fully suppressive ART (n = 8) when compared to T cell material from healthy donors  
3 (n = 9). For the Kinexus antibody array data globally normalized fluorescence data for each  
4 altered kinase/phosphatase/transcription factor are presented, as well as Z-ratios. Z  
5 normalization in general displays greater stability as a result of examining where each signal  
6 falls in the overall distribution of values within a given sample than fold-induction data. For  
7 further details see the detailed description in the Material and Methods section.

8

| Target Protein Name        | Phospho Site (Human) | Globally Normalized - Control | Globally Normalized - HIV | Z-ratio (C, HIV) | Uniprot Link           |
|----------------------------|----------------------|-------------------------------|---------------------------|------------------|------------------------|
| 4E-BP1                     | T45                  | 943                           | 442                       | -1.79            | <a href="#">Q13541</a> |
| Adducin a                  | S726                 | 881                           | 1233                      | 1.66             | <a href="#">P35611</a> |
| Bcl-xL                     | Pan-specific         | 5053                          | 3209                      | -1.31            | <a href="#">Q07817</a> |
| Bcl-xS/L                   | Pan-specific         | 6377                          | 4134                      | -1.32            | <a href="#">Q07817</a> |
| Bid                        | Pan-specific         | 2419                          | 1428                      | -1.33            | <a href="#">P59957</a> |
| BRCA1                      | S1423                | 1709                          | 752                       | -2.15            | <a href="#">P38398</a> |
| BRD2                       | Pan-specific         | 767                           | 359                       | -1.74            | <a href="#">P25440</a> |
| CA9                        | Pan-specific         | 1647                          | 904                       | -1.45            | <a href="#">Q16790</a> |
| Caldesmon                  | S789                 | 2451                          | 909                       | -2.80            | <a href="#">Q05682</a> |
| CAMK1a                     | Pan-specific         | 1771                          | 817                       | -2.02            | <a href="#">Q14012</a> |
| CAMK2b                     | Pan-specific         | 1232                          | 684                       | -1.33            | <a href="#">Q13554</a> |
| CaMK4                      | Pan-specific         | 1164                          | 461                       | -2.38            | <a href="#">Q16566</a> |
| CASP1                      | Pan-specific         | 1812                          | 1011                      | -1.43            | <a href="#">P29466</a> |
| CASP3                      | Pan-specific         | 1129                          | 495                       | -2.05            | <a href="#">P42574</a> |
| CASP6                      | Pan-specific         | 613                           | 225                       | -2.43            | <a href="#">P56212</a> |
| CASP7                      | Pan-specific         | 1778                          | 655                       | -2.72            | <a href="#">P55210</a> |
| CASP7                      | Pan-specific         | 1474                          | 609                       | -2.31            | <a href="#">P55210</a> |
| Catenin a                  | S641                 | 925                           | 408                       | -1.97            | <a href="#">P35221</a> |
| Catenin b                  | Y333                 | 3923                          | 2008                      | -1.92            | <a href="#">P35222</a> |
| Catenin b                  | S33                  | 2507                          | 1466                      | -1.37            | <a href="#">P35222</a> |
| Caveolin 1                 | Y14                  | 962                           | 322                       | -2.85            | <a href="#">Q03135</a> |
| Caveolin 1                 | Pan-specific         | 829                           | 338                       | -2.19            | <a href="#">Q03135</a> |
| Cdc25C                     | Pan-specific         | 6383                          | 4178                      | -1.29            | <a href="#">P30307</a> |
| CDK7                       | Pan-specific         | 1088                          | 563                       | -1.52            | <a href="#">P24941</a> |
| CDK7                       | Pan-specific         | 733                           | 326                       | -1.88            | <a href="#">P50613</a> |
| CDK8                       | Pan-specific         | 2677                          | 1320                      | -1.93            | <a href="#">P49336</a> |
| CK1d                       | Pan-specific         | 3720                          | 5904                      | 1.65             | <a href="#">P48730</a> |
| DDIT3(CHOP)                | Pan-specific         | 1424                          | 2340                      | 2.03             | <a href="#">P35639</a> |
| EGFR                       | Y1092                | 1745                          | 2334                      | 1.33             | <a href="#">P00533</a> |
| eIF2a                      | S52                  | 822                           | 1244                      | 1.93             | <a href="#">P05198</a> |
| eIF4E                      | S209                 | 775                           | 1513                      | 2.75             | <a href="#">P06730</a> |
| ErbB3                      | Y1328                | 2367                          | 1390                      | -1.34            | <a href="#">P21860</a> |
| Erk1 (MAPK3)+ Erk2 (MAPK1) | T202                 | 1113                          | 612                       | -1.33            | <a href="#">P27361</a> |
| FAK                        | S843                 | 937                           | 1194                      | 1.35             | <a href="#">Q05397</a> |
| FAK                        | S722                 | 1328                          | 1823                      | 1.49             | <a href="#">Q05397</a> |
| GSK3a                      | Pan-specific         | 792                           | 386                       | -1.62            | <a href="#">P49840</a> |
| GSK3a                      | Y279                 | 798                           | 1125                      | 1.71             | <a href="#">P49840</a> |
| Hsp27                      | S82                  | 2679                          | 1545                      | -1.43            | <a href="#">P04792</a> |
| IKKα                       | Pan-specific         | 984                           | 514                       | -1.46            | <a href="#">Q15111</a> |
| IRAK1                      | Pan-specific         | 1296                          | 718                       | -1.35            | <a href="#">P51617</a> |
| JNK1 (MAPK8)               | Pan-specific         | 1213                          | 1564                      | 1.32             | <a href="#">P45983</a> |
| JNK1/2/3                   | T183 + Y185          | 1139                          | 1448                      | 1.29             | <a href="#">P45983</a> |
| JNK1/2/3                   | T183 + Y185          | 1519                          | 2029                      | 1.36             | <a href="#">P45983</a> |
| Lck                        | Y192                 | 2396                          | 3591                      | 1.59             | <a href="#">P06239</a> |
| MST3                       | Pan-specific         | 752                           | 990                       | 1.52             | <a href="#">Q9Y6E0</a> |
| NFκB p50                   | Pan-specific         | 4340                          | 6380                      | 1.36             | <a href="#">P19838</a> |
| p25                        | Pan-specific         | 3670                          | 5718                      | 1.59             | <a href="#">Q15078</a> |
| p27 Kip1                   | Pan-specific         | 2368                          | 3782                      | 1.60             | <a href="#">P46527</a> |
| p53                        | Pan-specific         | 3321                          | 5034                      | 1.53             | <a href="#">P04637</a> |
| PDGFRα                     | Y754                 | 3255                          | 6354                      | 2.33             | <a href="#">P16234</a> |
| PERP                       | Pan-specific         | 714                           | 937                       | 1.52             | <a href="#">Q9H230</a> |
| PKA Ca/b                   | Pan-specific         | 1184                          | 1633                      | 1.53             | <a href="#">P17612</a> |
| PKA Ca/b                   | T198                 | 6155                          | 10125                     | 1.62             | <a href="#">P17612</a> |
| PKBa (Akt1)                | Pan-specific         | 4071                          | 6185                      | 1.48             | <a href="#">P31749</a> |
| PKBa (Akt1)                | S473                 | 1420                          | 2702                      | 2.49             | <a href="#">P31749</a> |
| PKCb1                      | Pan-specific         | 1012                          | 434                       | -2.08            | <a href="#">P05771</a> |
| PKCg                       | Pan-specific         | 1836                          | 3565                      | 2.48             | <a href="#">P05129</a> |
| PKCq                       | Pan-specific         | 1113                          | 1419                      | 1.30             | <a href="#">Q04759</a> |
| PKCz                       | Pan-specific         | 1800                          | 2476                      | 1.40             | <a href="#">Q05513</a> |
| PP2Ca                      | Pan-specific         | 1019                          | 470                       | -1.86            | <a href="#">P35813</a> |
| PP5C                       | Pan-specific         | 1014                          | 1405                      | 1.59             | <a href="#">P53041</a> |
| RSK1/2                     | S363/S369            | 658                           | 1107                      | 2.33             | <a href="#">Q15418</a> |
| STAT3                      | S727                 | 792                           | 1009                      | 1.40             | <a href="#">P40763</a> |
| STAT3                      | Pan-specific         | 2702                          | 6330                      | 2.96             | <a href="#">P40763</a> |
| STAT5B                     | Pan-specific         | 5627                          | 8764                      | 1.47             | <a href="#">P51692</a> |
| Trail                      | Pan-specific         | 10920                         | 17704                     | 1.41             | <a href="#">P50591</a> |
